# Supplementary material for: Prognostic Impact of Fusobacterium nucleatum Depends on Combined Tumor Location and Microsatellite Instability Status in Stage II/III Colorectal Cancers Treated with Adjuvant Chemotherapy
Source: PubMed Central journal article supplement — J Pathol Transl Med. 2018 Dec 26;53(1):40–9. doi: 10.4132/jptm.2018.11.29 (PMC6344805; doi:10.4132/jptm.2018.11.29), 2018-12-26
Supplement: jptm-2018-11-29-suppl1.pdf [file jptm-2018-11-29-suppl1.pdf]

| F-nucleatum conc. (ng) | Ct    | 2 <sup>-Δ(-Ct)</sup> |
|------------------------|-------|----------------------|
| 0.03900000000          | 18.54 | 2.62364E-06          |
| 0.01950000000          | 19.87 | 1.0436E-06           |
| 0.00975000000          | 20.76 | 5.63141E-07          |
| 0.00487500000          | 22.01 | 2.36772E-07          |
| 0.00243750000          | 22.62 | 1.55132E-07          |
| 0.00121875000          | 23.71 | 7.2875E-08           |
| 0.00060937500          | 25.03 | 2.9189E-08           |
| 0.00030468750          | 25.97 | 1.52143E-08          |
| 0.00015234375          | 26.88 | 8.09681E-09          |
| 0.00007617188          | 27.35 | 5.84561E-09          |
| 0.00003808594          | 28.54 | 2.56215E-09          |
| 0.00001904297          | 29.29 | 1.52346E-09          |
| 0.00000952148          | 30.36 | 7.25654E-10          |
| 0.00000476074          | 31.35 | 3.6535E-10           |
| 0.00000238037          | 31.37 | 3.60321E-10          |
| 0.00000119019          | 33.87 | 6.36963E-11          |
| 0.00000059509          | 34.74 | 3.48512E-11          |

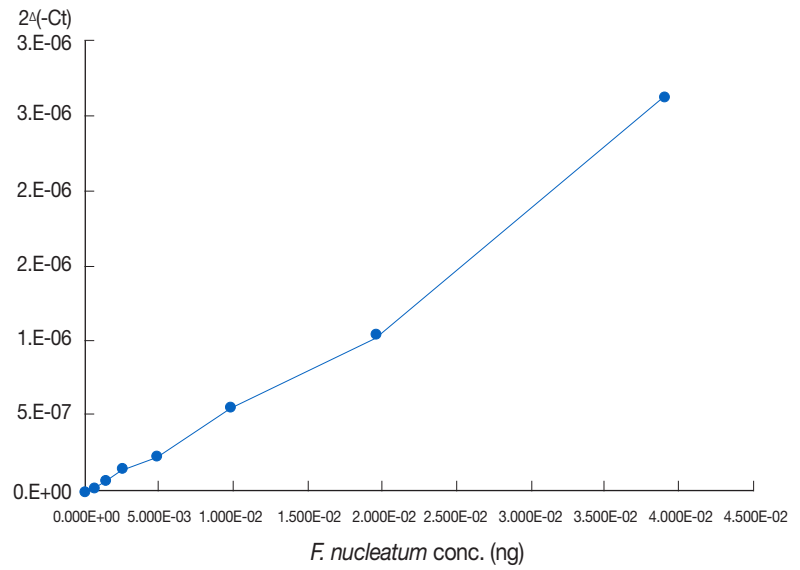

**Supplementary Fig. S1.** Validation of real-time polymerase chain reaction method for quantification of *Fusobacterium nucleatum* using serially diluted standard genomic DNA of *F. nucleatum*.
