# Supplementary material for: Prognostic Impact of Fusobacterium nucleatum Depends on Combined Tumor Location and Microsatellite Instability Status in Stage II/III Colorectal Cancers Treated with Adjuvant Chemotherapy
Source: PubMed Central journal article supplement — J Pathol Transl Med. 2018 Dec 26;53(1):40–9. doi: 10.4132/jptm.2018.11.29 (PMC6344805; doi:10.4132/jptm.2018.11.29), 2018-12-26
Supplement: jptm-2018-11-29-suppl3.pdf [file jptm-2018-11-29-suppl3.pdf]

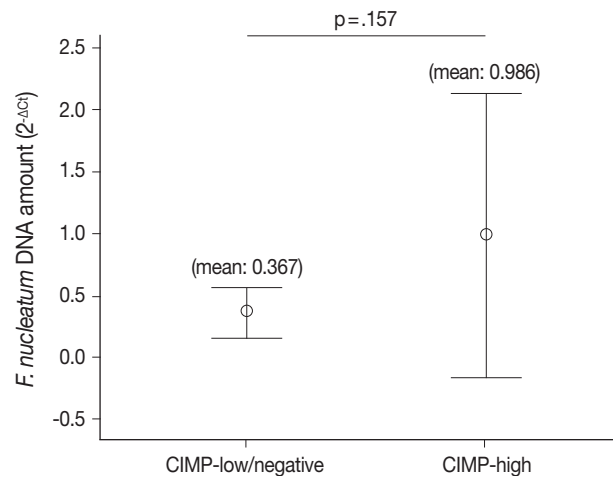

**Supplementary Fig. S3.** Mean comparison of *Fusobacterium nucleatum* DNA amount ( $2^{-\Delta C_t}$ ) between CpG island methylator phenotype (CIMP)-high and CIMP-low/negative subgroups in stage II/III colorectal cancers treated with oxaliplatin-based adjuvant chemotherapy (Error bars indicate 95% confidence interval of mean of *F. nucleatum* DNA amount [ $2^{-\Delta C_t}$ ]).
